# Supplementary material for: A chemical biology screen reveals a role for Rab21-mediated control of actomyosin contractility in fibroblast-driven cancer invasion
Source: PubMed Central journal article supplement (PMC2816649; doi:10.1038/sj.bjc.6605469), 2009-12-01
Supplement: 6605469x1.pdf [file 6605469x1.pdf]

## Supplementary Figure 1 Hooper et al.,

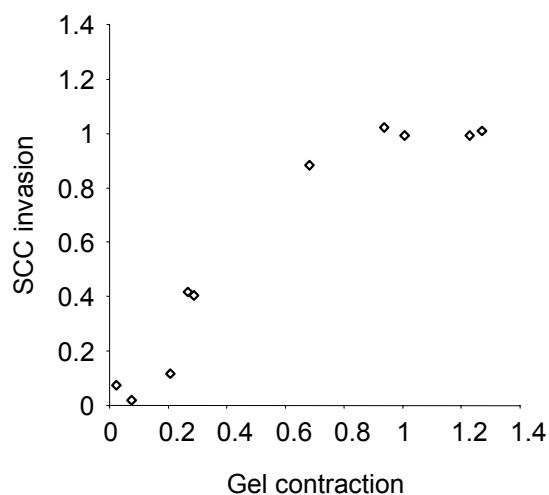

**Supplementary Figure 1:** Correlation between macroscopic matrix contraction by carcinoma associated fibroblasts and their ability to promote SCC invasion. Each point corresponds to a different siRNA treatment or inhibitor treatment (data for siRNA against integrins  $\alpha 1$ ,  $\alpha 2$ ,  $\alpha 3$ ,  $\alpha 4$ ,  $\alpha 5$ ,  $\alpha V$  and the following inhibitors 10 $\mu$ M Y27632, 10 $\mu$ M H1152, Tat-C3). Values for both gel contraction and SCC invasion are normalized to 1. Original data from Gaggioli et al., (1).

## Supplementary Figure 2 Hooper et al.,

**A**

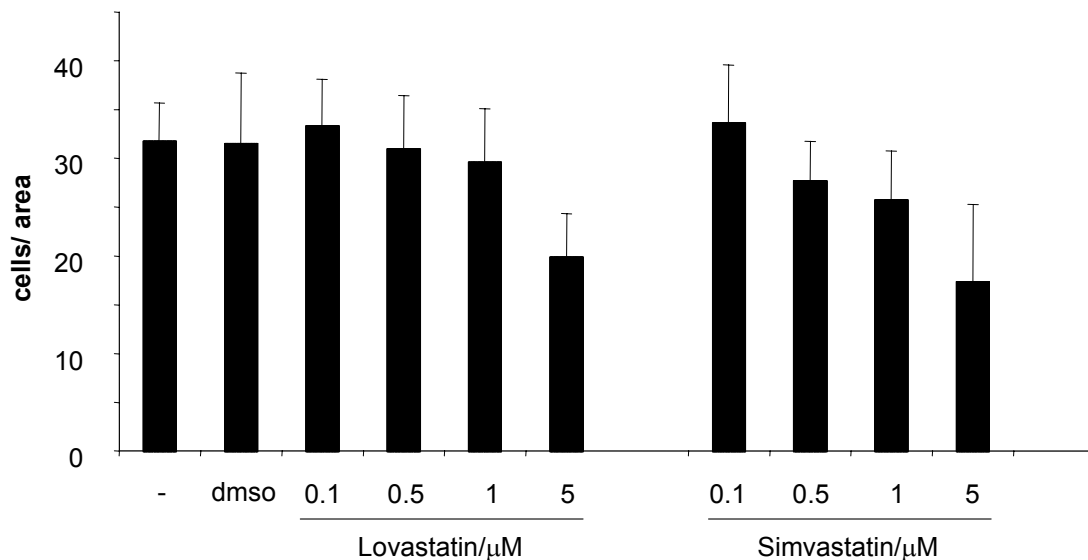

**B**

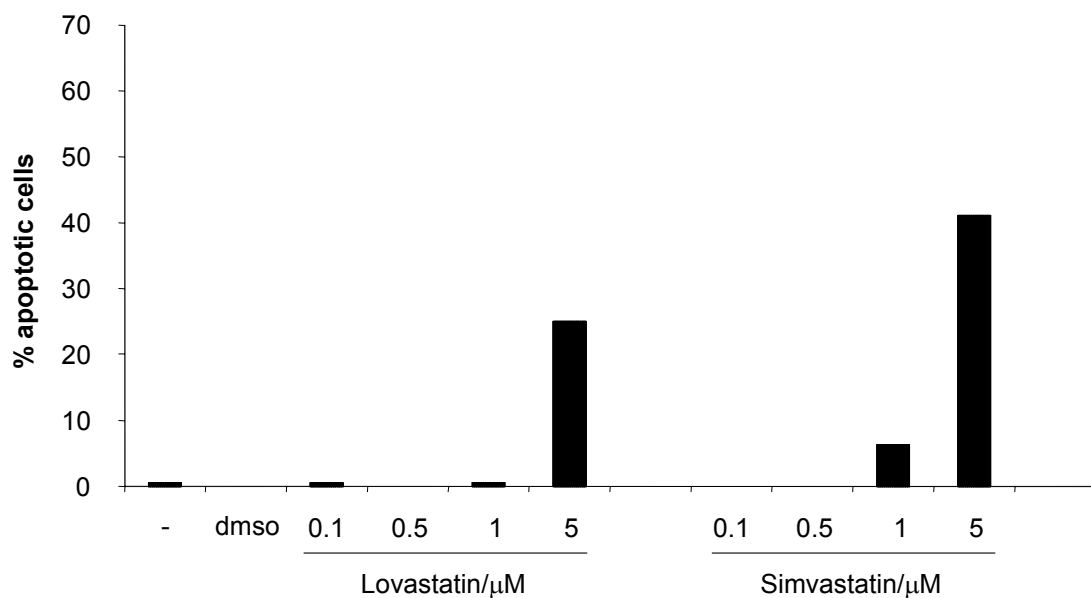

**Supplementary Figure 2:** A) Fibroblasts were plated on top of collagen I/matrigel matrices and treated with the indicated dose of statin for 4 days. The number of cells present per 20x microscope field was then determined - the average of three fields is shown. B) Fibroblasts were plated on top of collagen I/matrigel matrices and treated with the indicated dose of statin for 4 days. The number of apoptotic cells present per 20x microscope field was then determined based on nuclear morphology following DAPI staining - the average of three fields is shown.

Supplementary Figure 3 Hooper et al.,

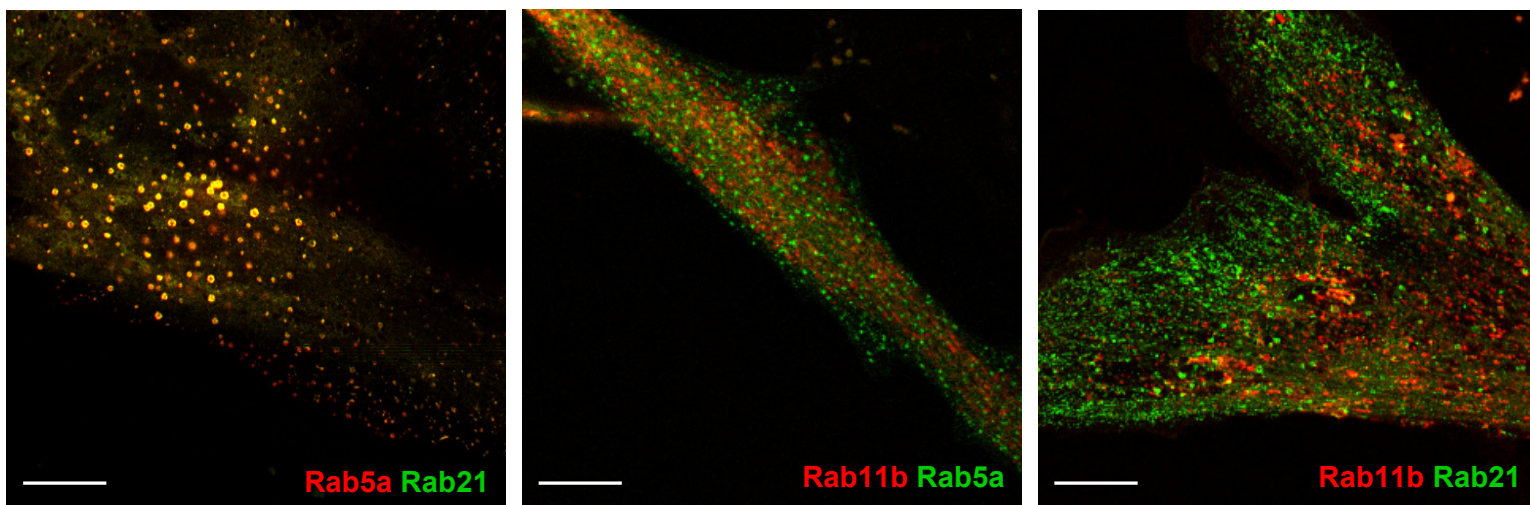

**Supplementary Figure 3:** The relative localisation of Rab5a, 11b and 21 in CAF's is shown: left panel shows Rab5a (red) and Rab21 (green), middle panel shows Rab11b (red) and Rab21 (green) and right panel shows Rab11b (red) and Rab5a (green). Scale bar is 10 $\mu$ m.

A

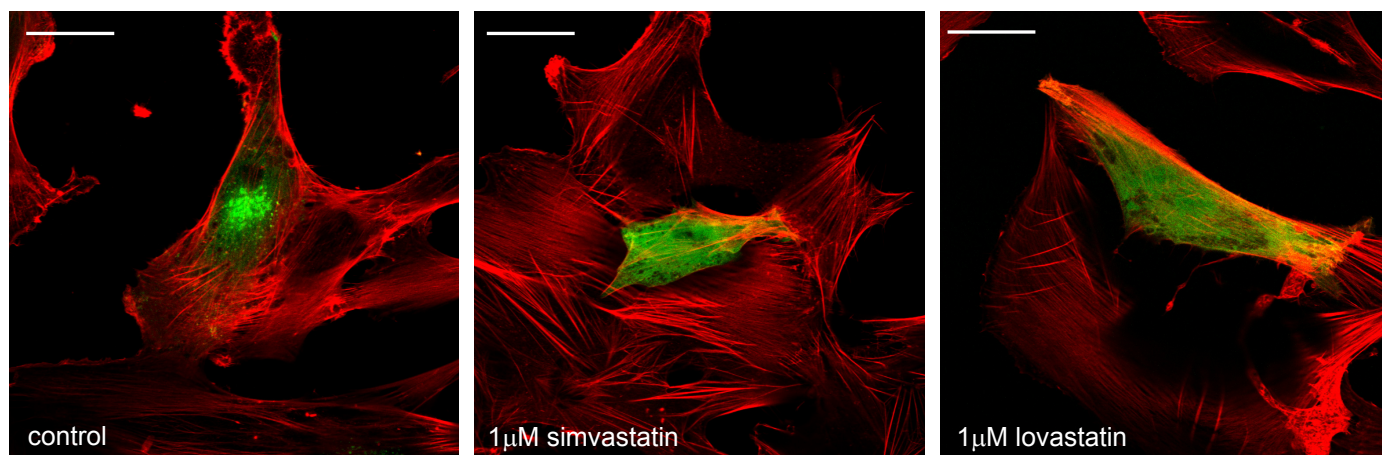

B

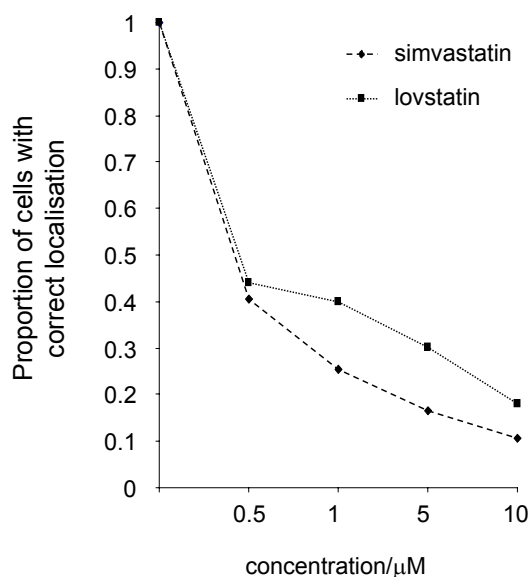

**Supplementary Figure 4:** A) The localisation of CFP-Rab21 is shown (in green) in control or 1 $\mu$ M simvastatin- or 1 $\mu$ M lovastatin-treated fibroblasts. F-actin is shown in red – scale bar is 40 $\mu$ m. B) Quantification of the proportion of CAF's with correct sub-cellular targeting of CFP-Rab21 at the indicated doses of lovastatin or simvastatin. Average of two experiments.

Supplementary Figure 5 Hooper et al.,

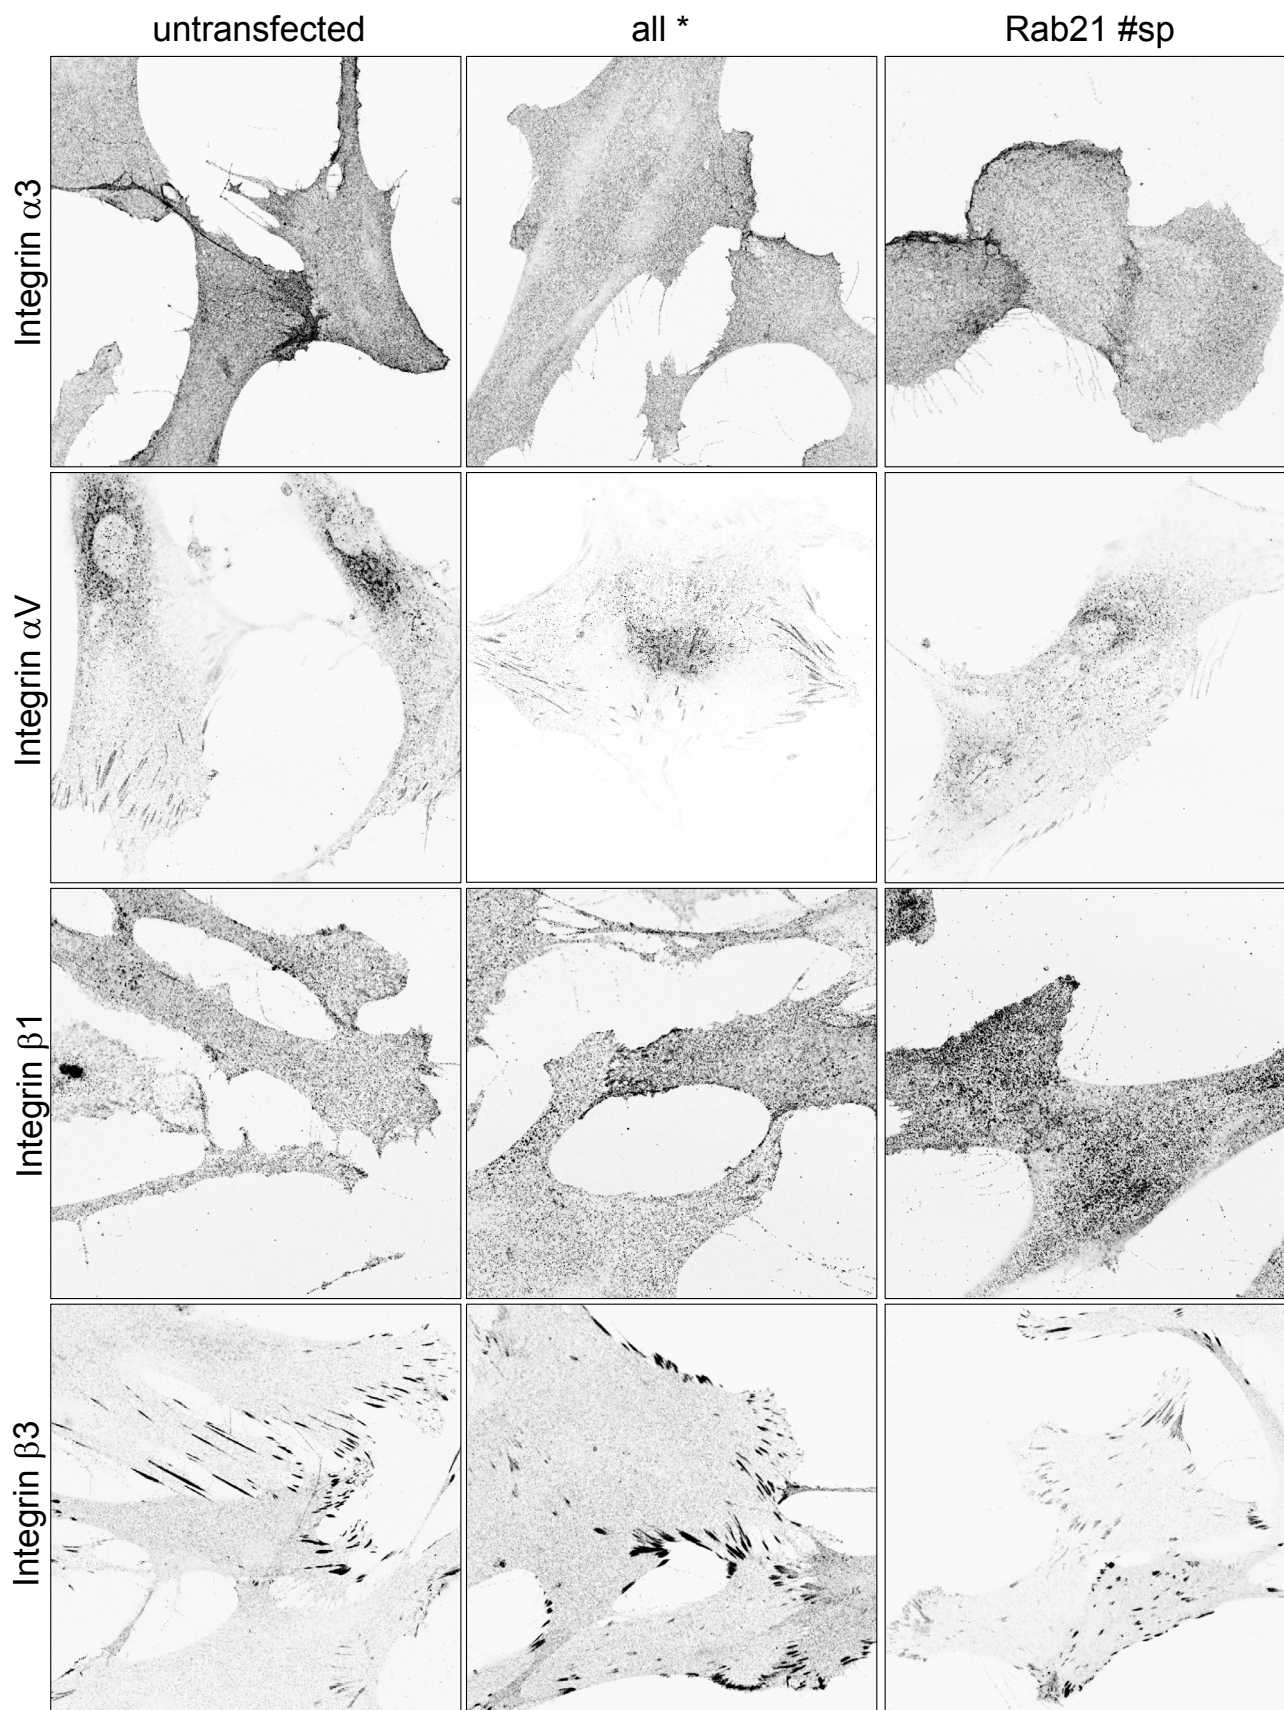

**Supplementary Figure 5:** The localization of integrins  $\alpha 3$ ,  $\alpha V$ ,  $\beta 1$  and  $\beta 3$  is shown in untransfected, 'all \*' and Rab21 smart pool siRNA transfected cells. Area 145x145 $\mu\text{m}$  is shown.

## Supplementary Figure 6 Hooper et al.,

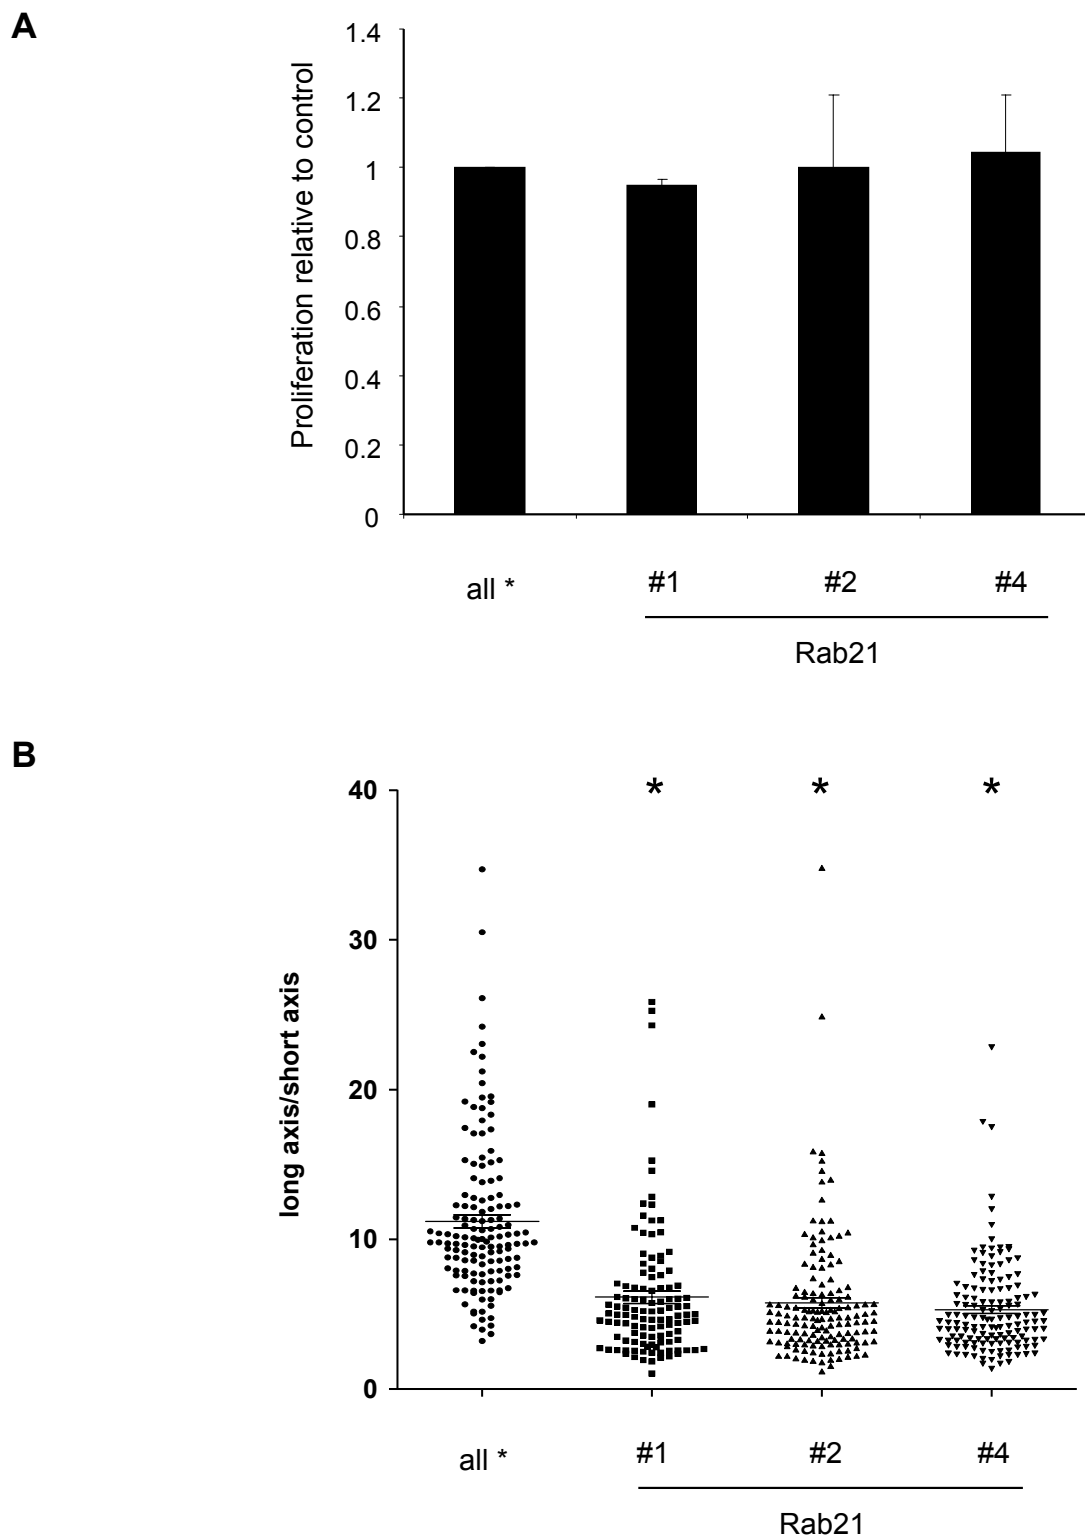

**Supplementary Figure 6:** A) The effect of Rab21 siRNA (oligos 1, 2, & 4) on CAF proliferation relative to allstars control siRNA is shown. B) The effect of Rab21 siRNA (oligos 1, 2, & 4) on CAF morphology compared to allstars control siRNA is shown. The long and short axis of >100 cells was measured for each condition (data pooled from two independent experiments, \* indicates  $p < 0.001$  Student's t-test). The long axis/short axis value is shown for each cell.
